# Supplementary material
Source: bioRxiv or medRxiv preprint supplement (https://www.biorxiv.org/highwire/filestream/8229/field_highwire_adjunct_files/4/030619-5.pdf)

**A**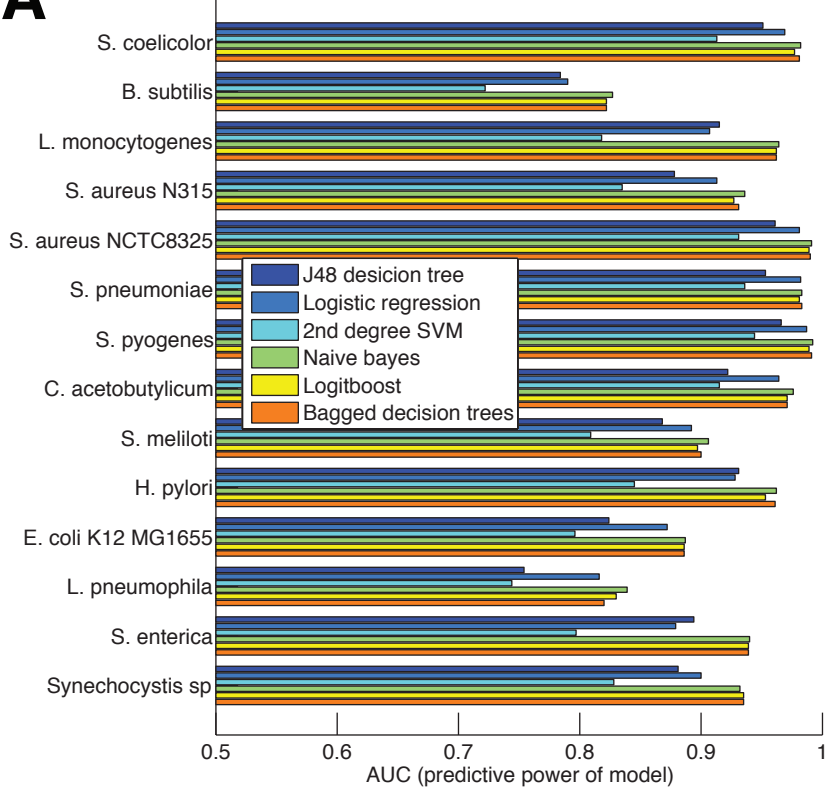**B**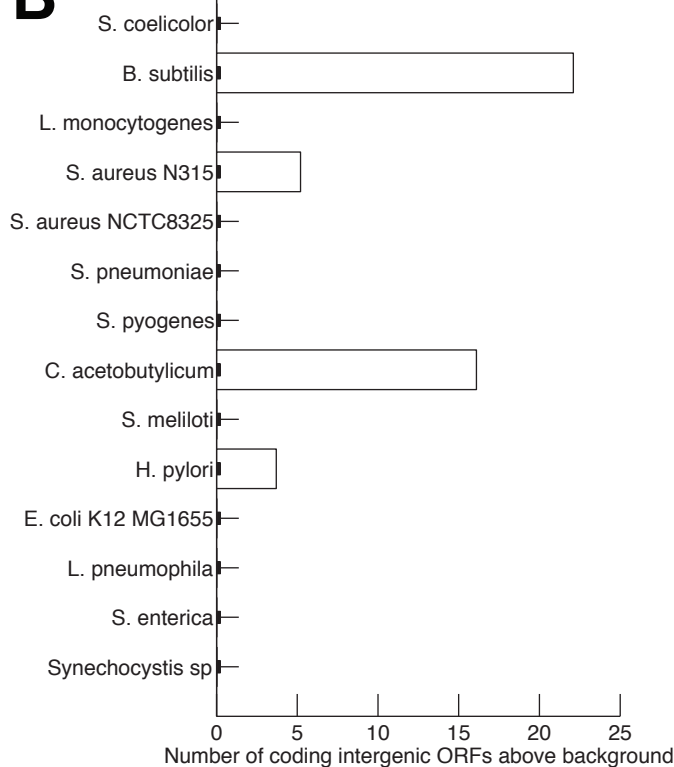**C**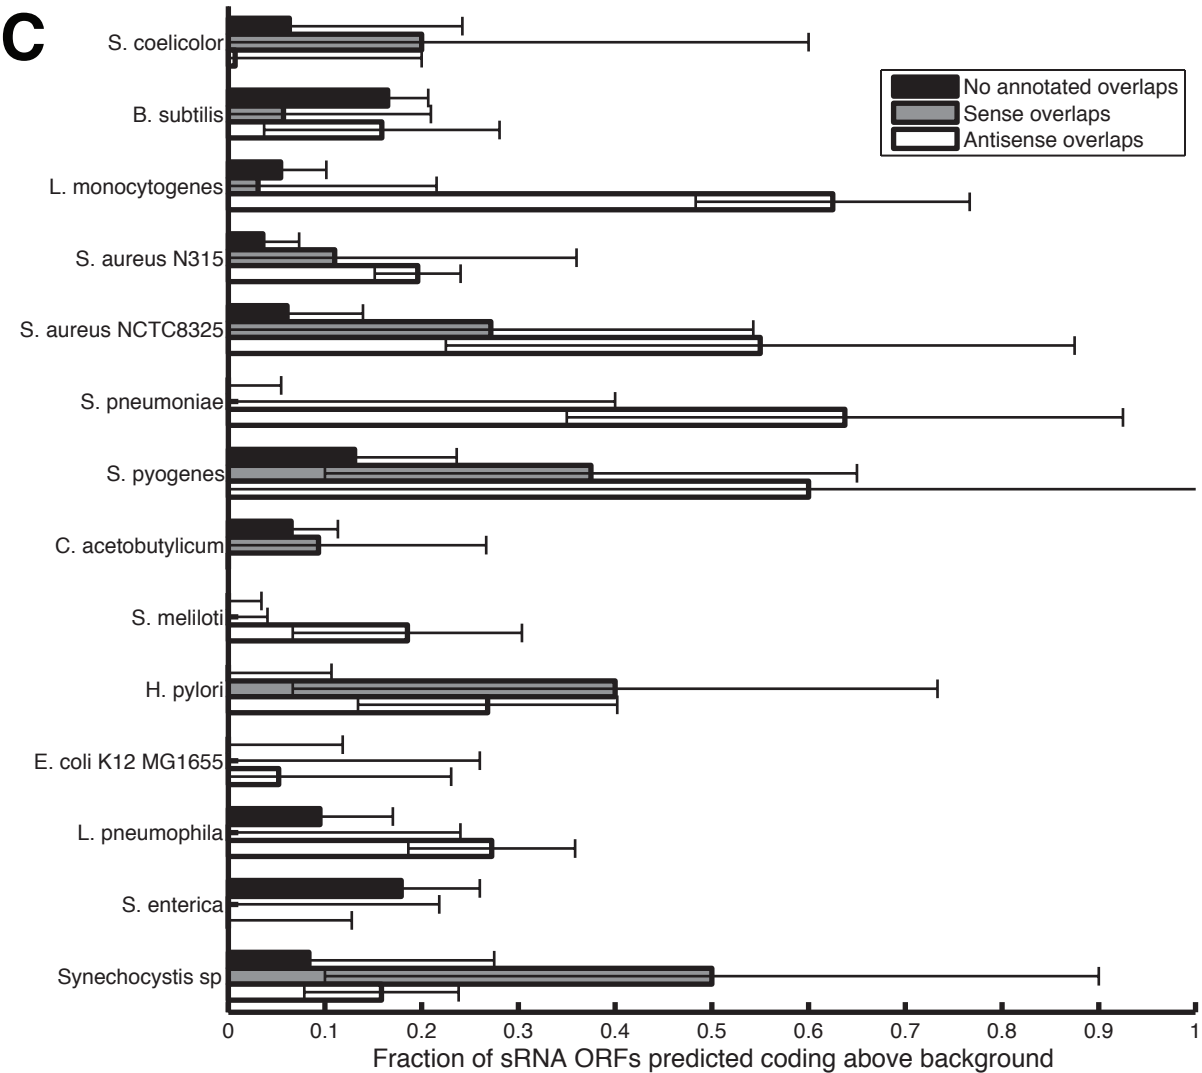

Supplement: Supplementary file [file 030619-5.pdf]
